# Supplementary material
Source: publisher figshare collection journal article supplement (https://tandf.figshare.com/ndownloader/files/20291343)
Supplement: Supplementary file 1 [file 20291343]

**Supporting Information**

**Table S1:** Efficacy of electrolyzed oxidizing water treatments on specific pathogens in suspension

| **Pathogen** | **Matrix/Active agent** | **Dose/contact time** | **Log reduction** | **Reference** |
| --- | --- | --- | --- | --- |
| *Escherichia coli* | PBS/  SAEW (20:1) | 5–10 min; 60 ppm ACC; ORP +910 mV; pH 6.4; volume ratio 20:1 | ~8 log CFU/mL | Ye et al 2017 |
| *E. coli* | TSB/  NEW (0.1/9.9 mL) | 10 min; 20–100 ppm total residual chlorine; ORP +800-900 mV; pH 6.3–6.5; 25°C | 6.1–6.7 log CFU/mL | Guentzel et al 2008 |
| *E. coli* | 0.85% NaCl/  LcEW (1/9 mL) | 1 min; 5–10 mg/L ACC; ORP +660–700 mV; pH 6.8–7.4 | 4.9–5.3 log CFU/mL | Rahman et al 2012 |
| *E. coli* O157:H7 | aCulture/sterile water/NEW (1/1/8 mL) | 5 min; 89 mg/L ACC; pH 7.99–8.19; ORP +745–771 mV; 23°C | >6 log CFU/mL | Deza et al 2003 |
| *E. coli* (range of strains) | NECAW | 30 s; 100 ppm FAC; ORP +864 mV; pH 7.0 | >5 log CFU/mL | Yang et al 2013 |
| *Salmonella* (range of strains) | NECAW | 30 s; 100 ppm FAC; ORP +864; pH 7.0 | >5 log CFU/mL | Yang et al 2013 |
| *Salmonella enteritidis* | Culture/sterile water/NEW (1/1/8 mL) | 5 min; 89 mg/L ACC; pH 7.99–8.19; ORP +745–771 mV; 23°C | >6 log CFU/mL | Deza et al 2003 |
| *Listeria monocytogenes* | Culture/sterile water/NEW (1/1/8 mL) | 5 min; 89 mg/L ACC; pH 7.99–8.19; ORP +745–771 mV; 23°C | >6 log CFU/mL | Deza et al 2003 |
| *Listeria monocytogenes* (range of strains) | PW/NECAW (1/99 mL) | 30 s; 50–100 ppm FAC; ORP +824–864; pH 7.0 | >5 log CFU/mL | Yang et al 2013 |
| *Listeria innocua* | Cells resuspended in NEW | 10 min; 150 ppm ACC; ORP +840 mV; pH 6.9; 23°C | 2.7 log CFU/mL | Feliciano et al 2012 |
| *Listeria innocua* | Cells resuspended in AEW | 10 min; 150 ppm ACC; ORP +1100 mV; pH 2.7; 23°C | 4.7 log CFU/mL | Feliciano et al 2012 |
| *Listeria monocytogenes* | TSB/  NEW (0.1/9.9 mL) | 10 min; 20–100 ppm total residual chlorine; ORP +800–900 mV; pH 6.3–6.5; 25°C | 6.1–6.7 log CFU/mL | Guentzel et al 2008 |
| *Listeria monocytogenes* | 0.85% NaCl/  LcEW (1/9 mL) | 1 min; 5–10 mg/L ACC; ORP +660–700 mV; pH 6.8–7.4 | 5.2–5.6 log CFU/mL | Rahman et al 2012 |
| *Listeria monocytogenes* | 0.85% NaCl/NEW (1/9 mL) | 30 s; 20 ppm total chlorine concentration; ORP +1100 mV; pH 7.0; 30°C | ≥5 log CFU/mL | Arevalos-Sanchez et al 2012 |

NEW: neutral electrolyzed water; AEW: acidic electrolyzed water; SAEW: slightly acidic electrolyzed water; CFU: colony forming unit; ACC: available chlorine concentrations; NECAW: neutral electrochemically activated water; LcEW: low concentration electrolyzed water; ORP: oxidation-reduction potential; PBS: phosphate buffered saline; TSB: trypticase soy broth; PW: peptone water

a details of culture medium not provided.

**References to Table S1:**

Arevalos-Sanchez, M., Regalado, C., Martin, S.E., Dominguez-Dominguez, J., Garcia-Almendarez, B.E., 2012. Effect of neutral electrolyzed water and nisin on *Listeria* *monocytogenes* biofilms, and on listeriolysin O activity. Food Control 24, 116-122.

Deza, M.A., Araujo, M., Garrido, M.J., 2003. Inactivation of *Escherichia coli* O157:H7, *Salmonella enteritidis* and *Listeria monocytogenes* on the surface of tomatoes by neutral electrolyzed water. Letters in Applied Microbiology 37, 482-487.

Feliciano, L., Lee, J., Pascall, M.A., 2012. Transmission electron microscopic analysis showing structural changes to bacterial cells treated with electrolyzed water and an acidic sanitizer. Journal of Food Science 77, M182-187.

Guentzel, J.L., Liang Lam, K., Callan, M.A., Emmons, S.A., Dunham, V.L., 2008. Reduction of bacteria on spinach, lettuce, and surfaces in food service areas using neutral electrolyzed oxidizing water. Food Microbiology 25, 36-41.

Rahman, S.M.E., Park, J.H., Wang, J., Oh, D.-H., 2012. Stability of low concentration electrolyzed water and its sanitization potential against foodborne pathogens. Journal of Food Engineering 113, 548-553.

Yang, H., Feirtag, J., Diez-Gonzalez, F., 2013. Sanitizing effectiveness of commercial “active water” technologies on *Escherichia coli* O157:H7, *Salmonella enterica* and *Listeria monocytogenes*. Food Control 33, 232-238.

Ye, Z., Wang, S., Chen, T., Gao, W., Zhu, S., He, J., Han, Z., 2017. Inactivation Mechanism of *Escherichia coli* Induced by Slightly Acidic Electrolyzed Water. Science Reports 7, 6279.
